# Supplementary material for: Enhancing superconductivity in MXenes through hydrogenation
Source: Royal Society of Chemistry journal article supplement (doi:10.1039/d2nr01939f), 2022-01-01

## Enhancing superconductivity in MXenes through hydrogenation

Jonas Bekaert<sup>1</sup>, Cem Sevik<sup>1,2</sup> and Milorad V. Milosevic<sup>1</sup>

<sup>1</sup>Department of Physics & NANOLab Center of Excellence,  
University of Antwerp, Groenenborgerlaan 171, B-2020 Antwerp, Belgium

<sup>2</sup>Department of Mechanical Engineering, Faculty of Engineering,  
Eskisehir Technical University, 26555 Eskisehir, Turkey

### VIBRATIONAL PROPERTIES

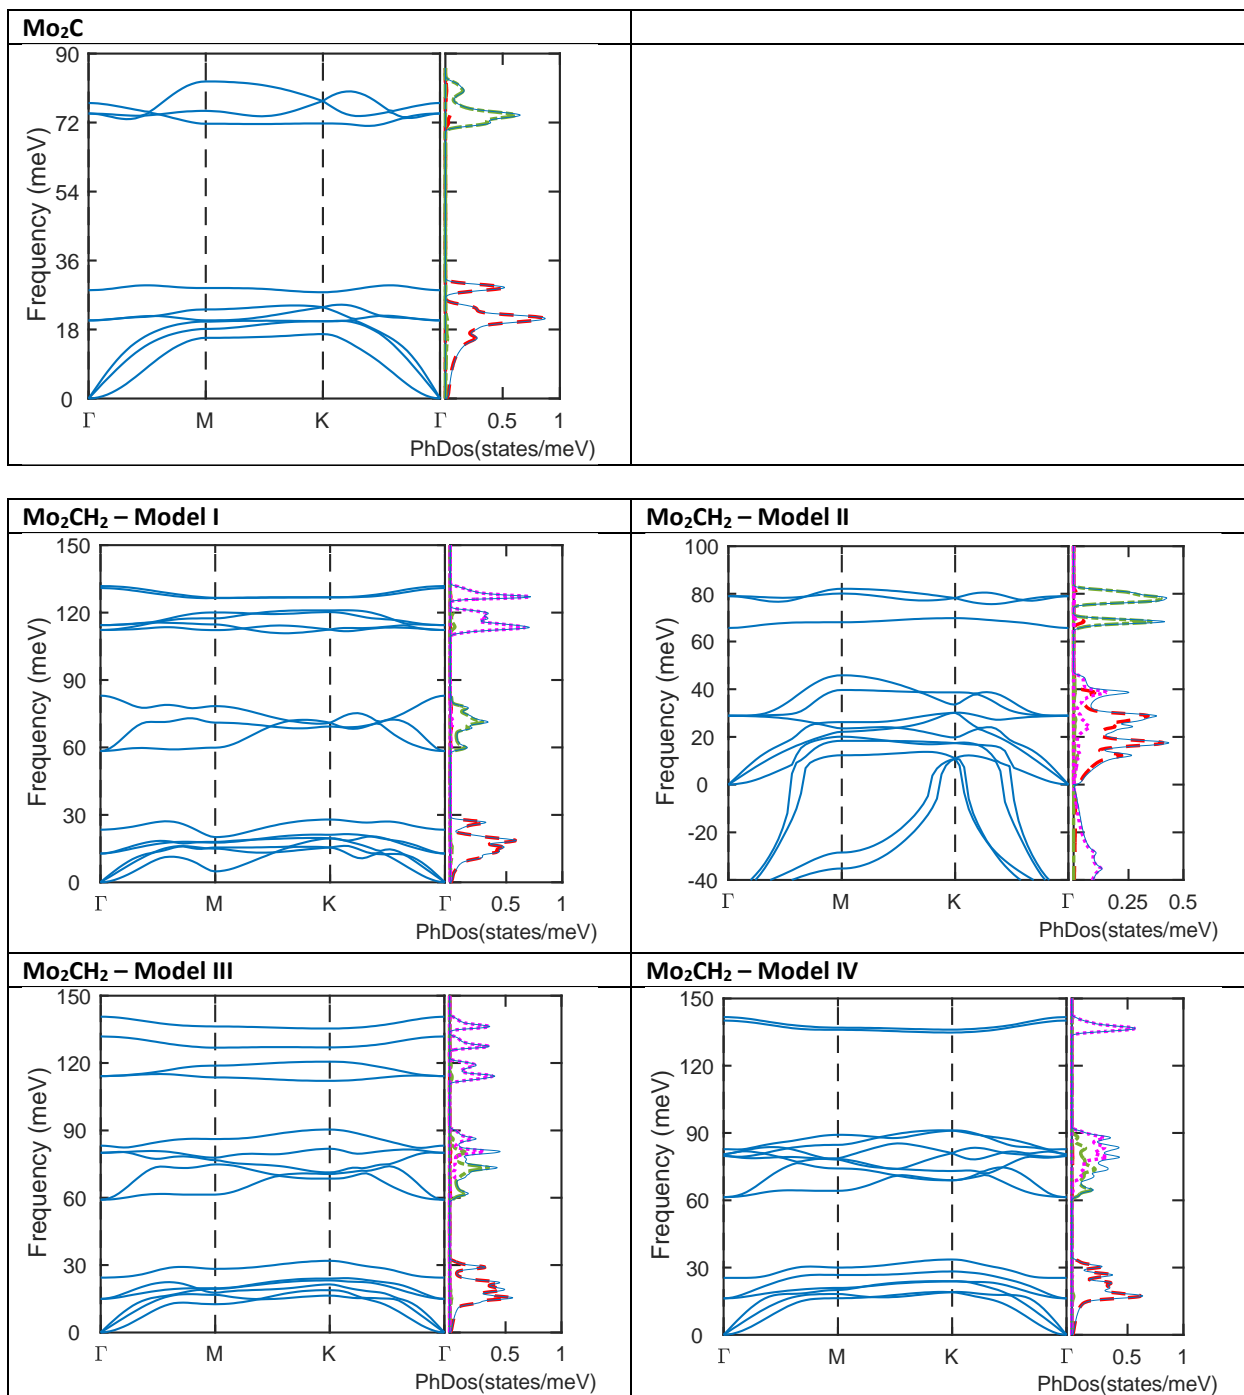

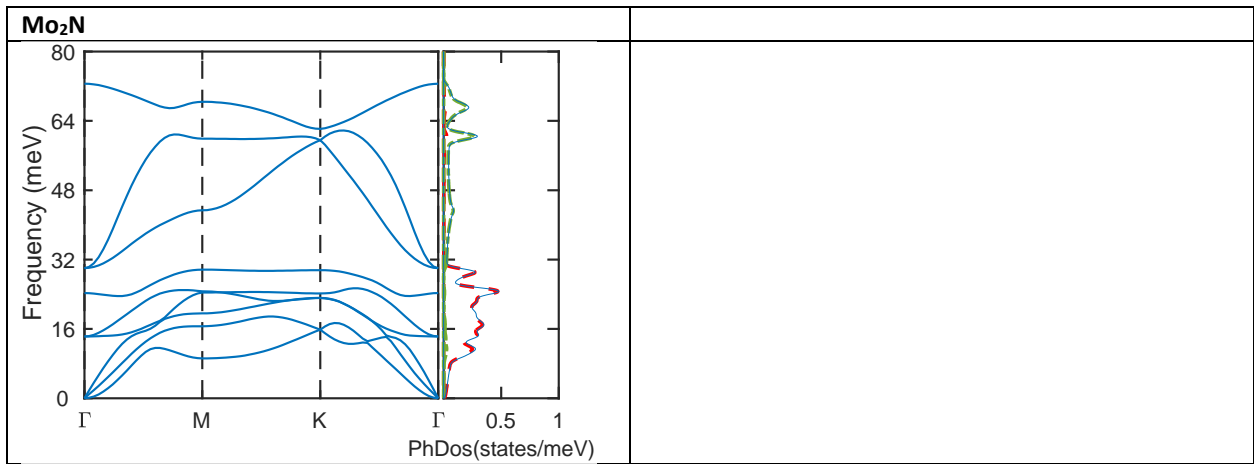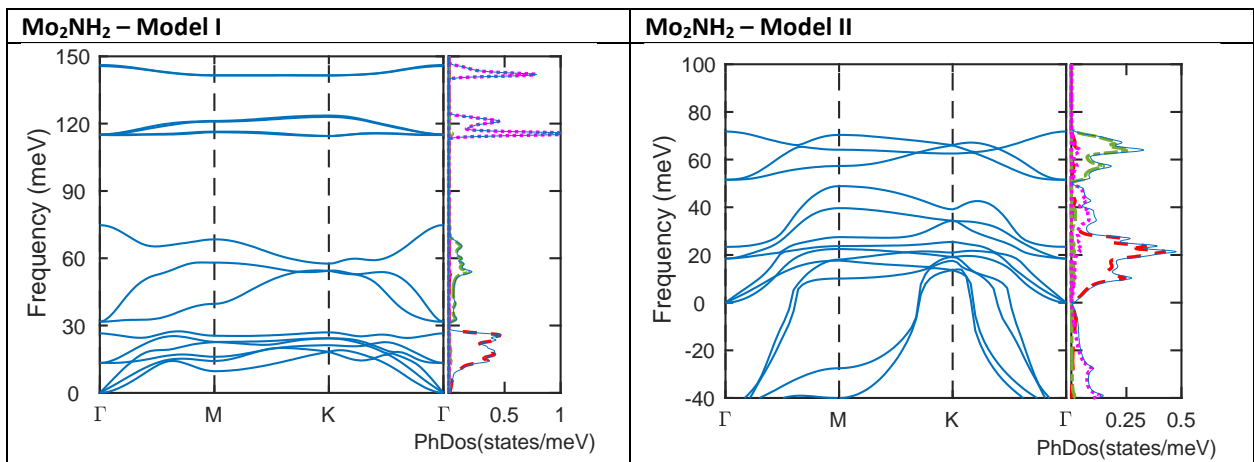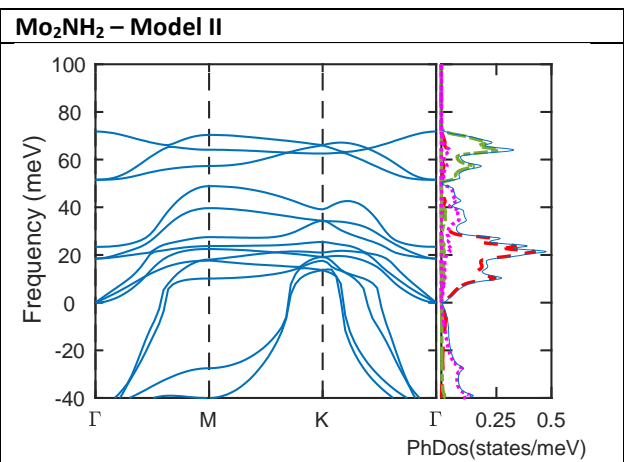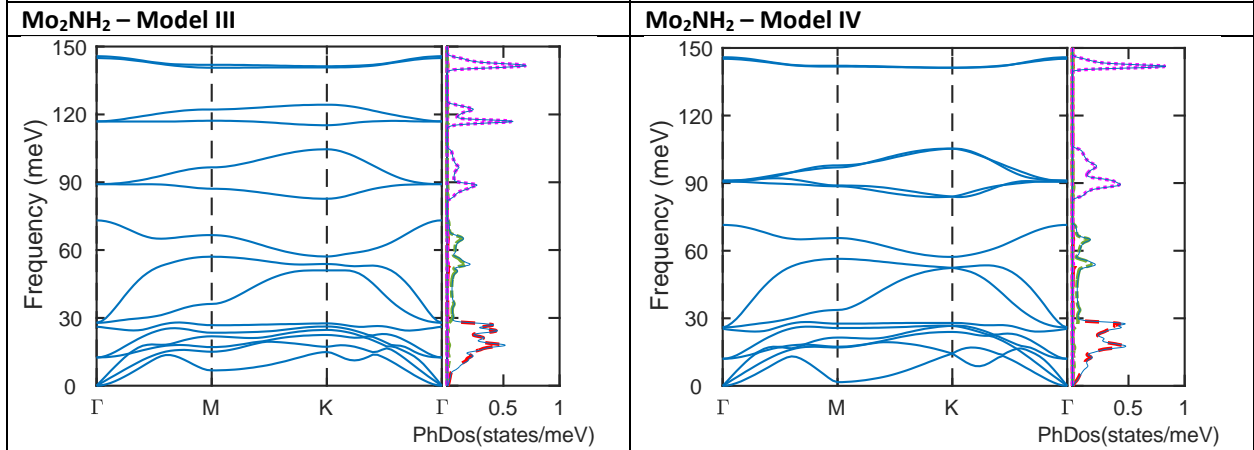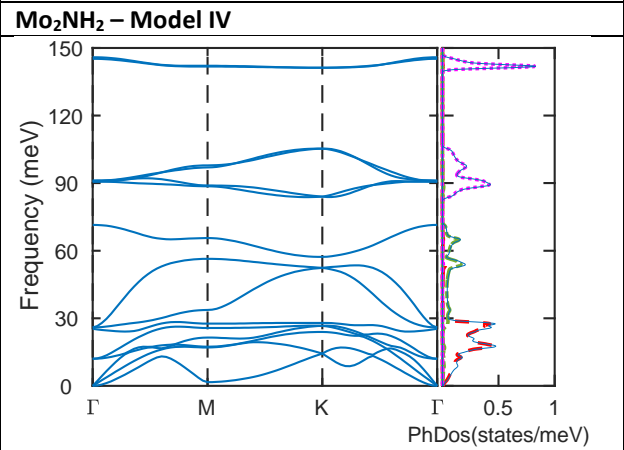

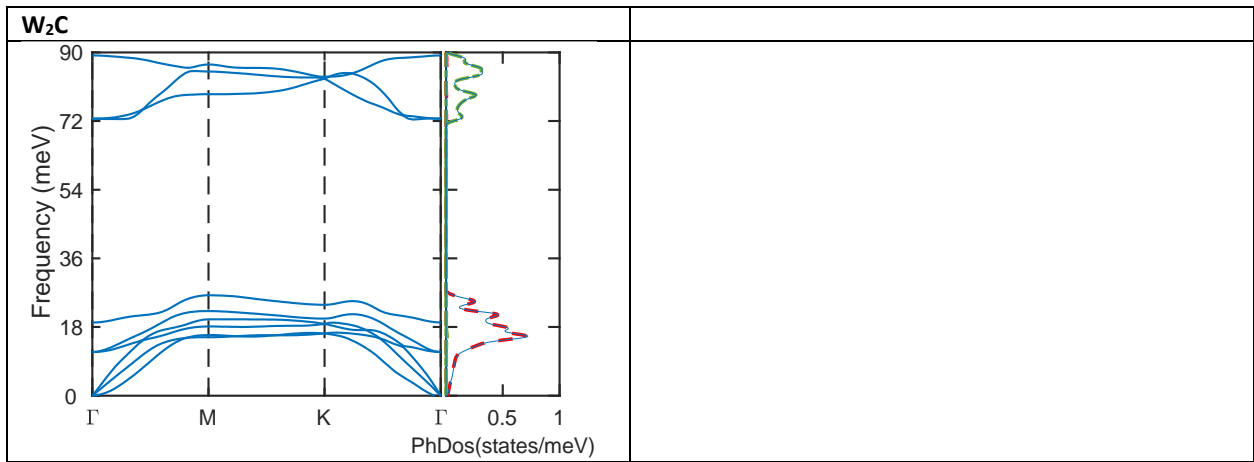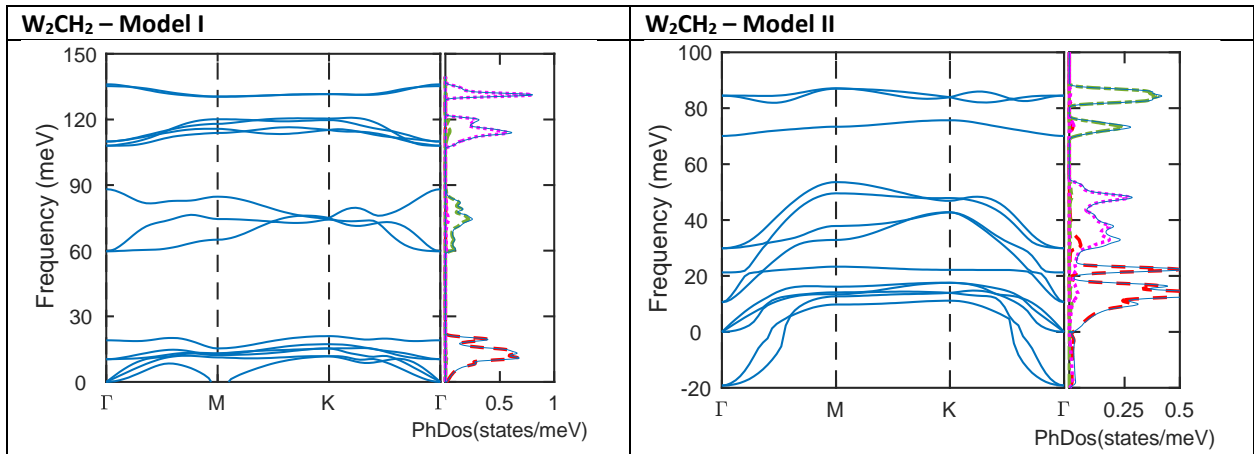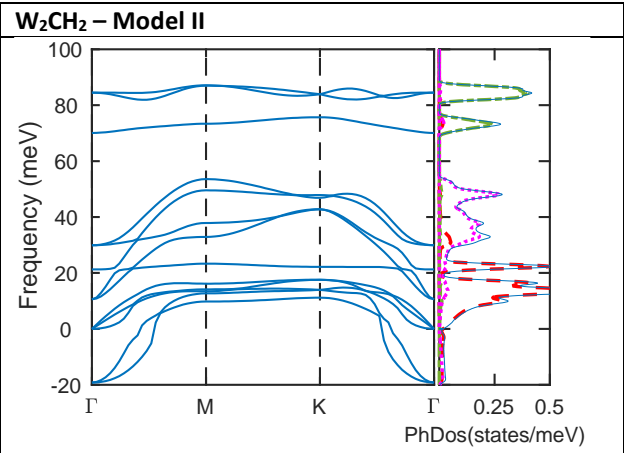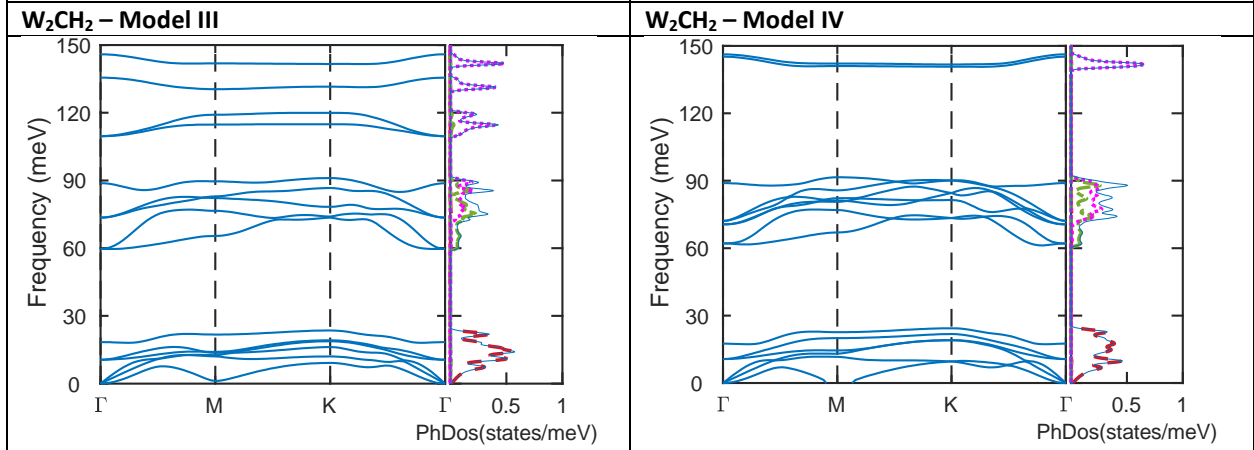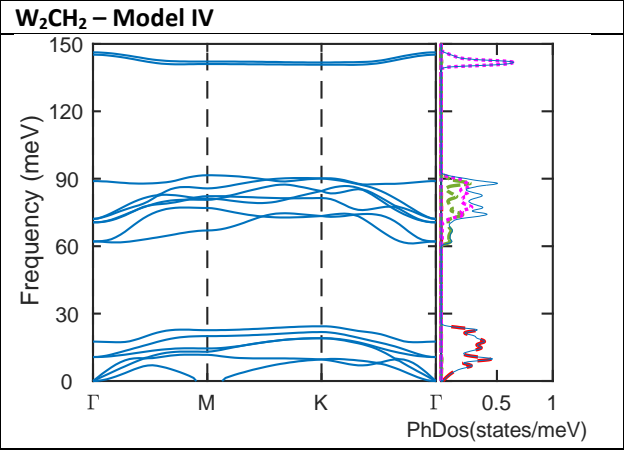

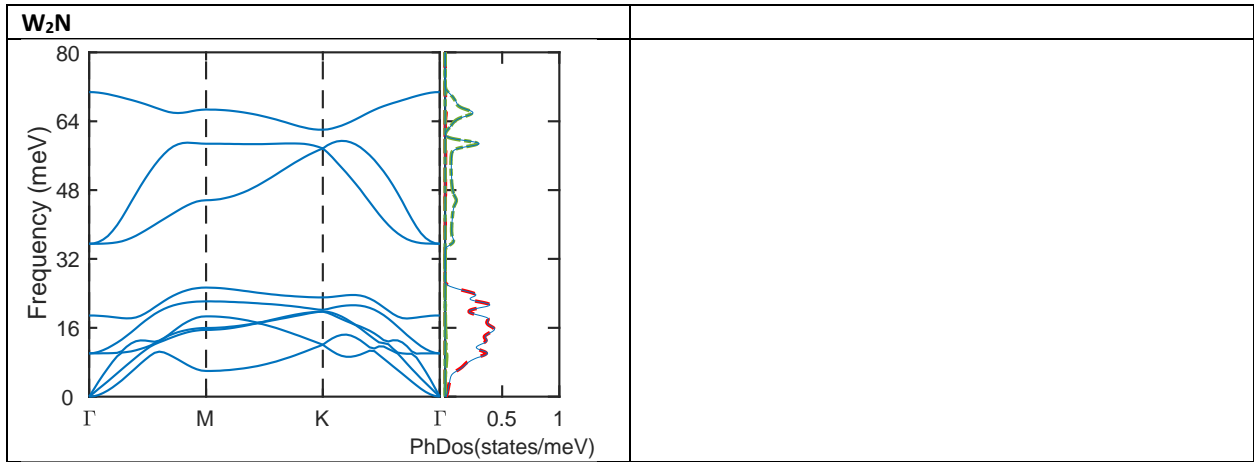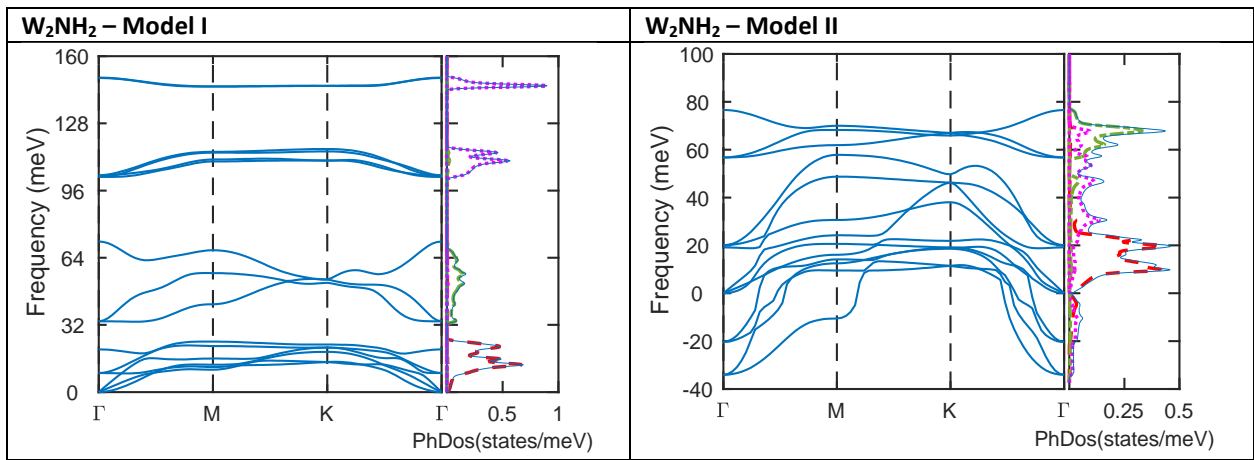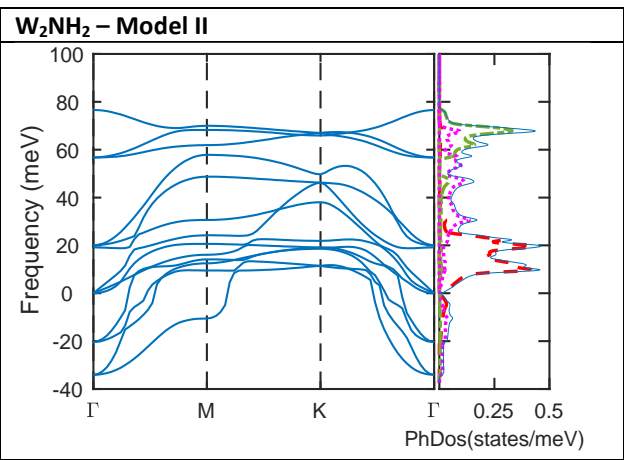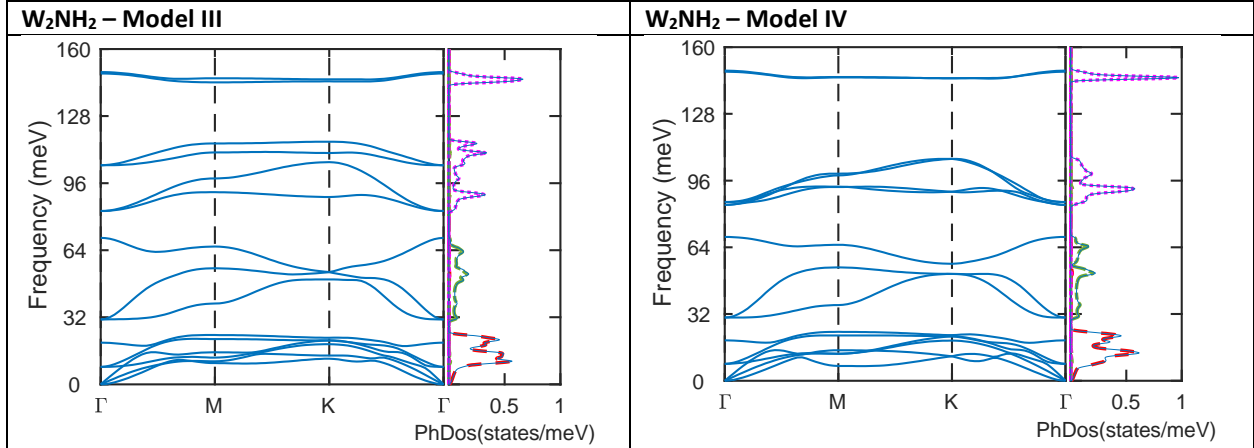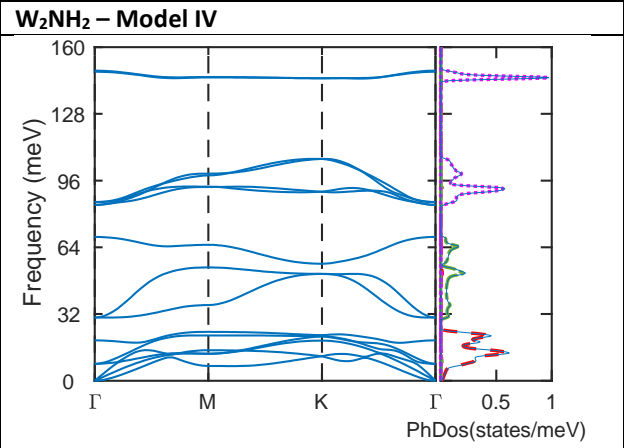

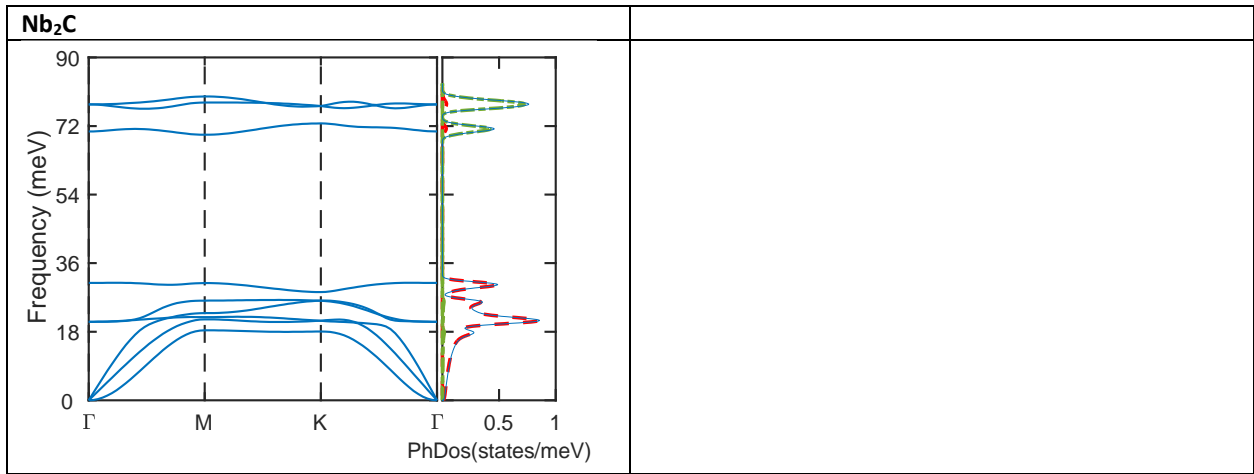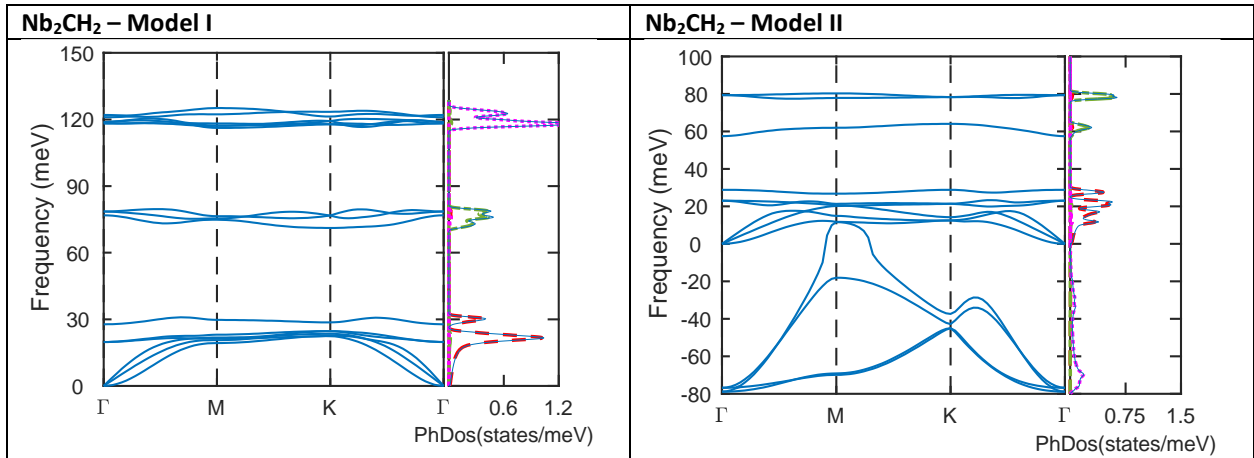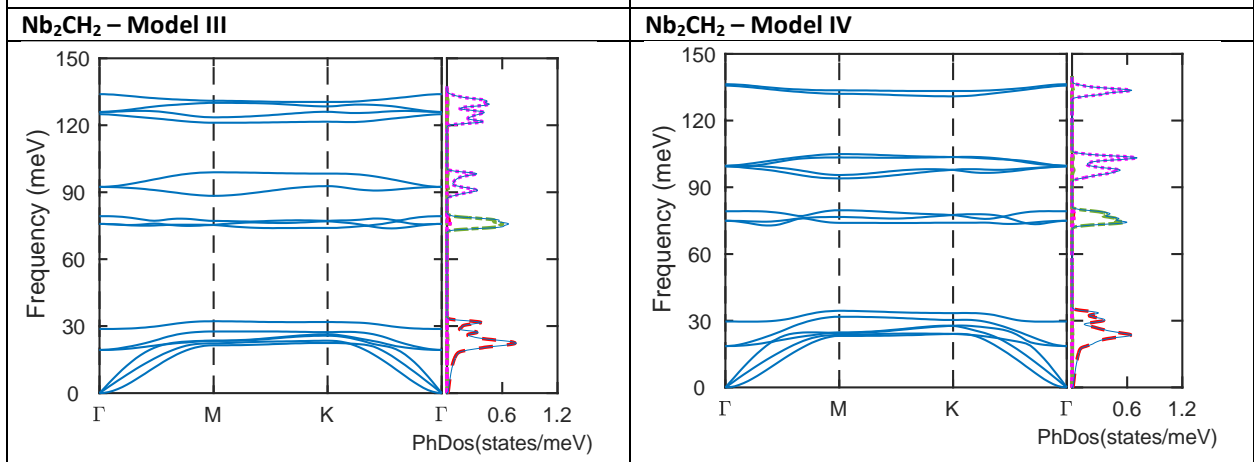

# ELECTRONIC BAND STRUCTURES

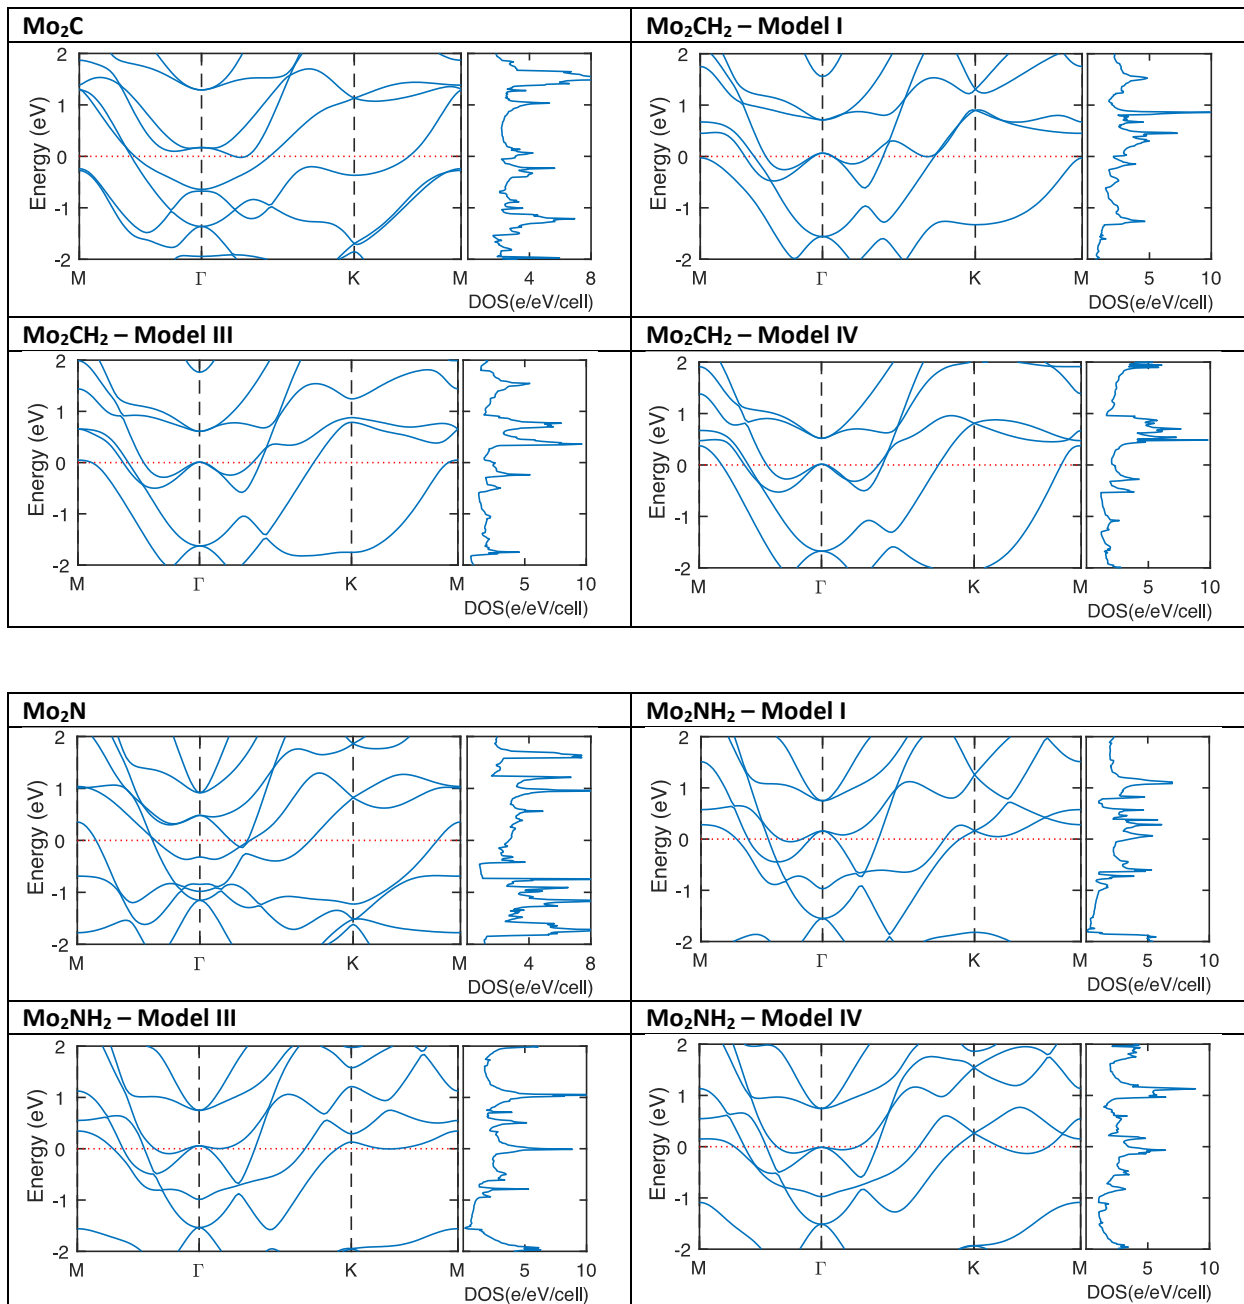

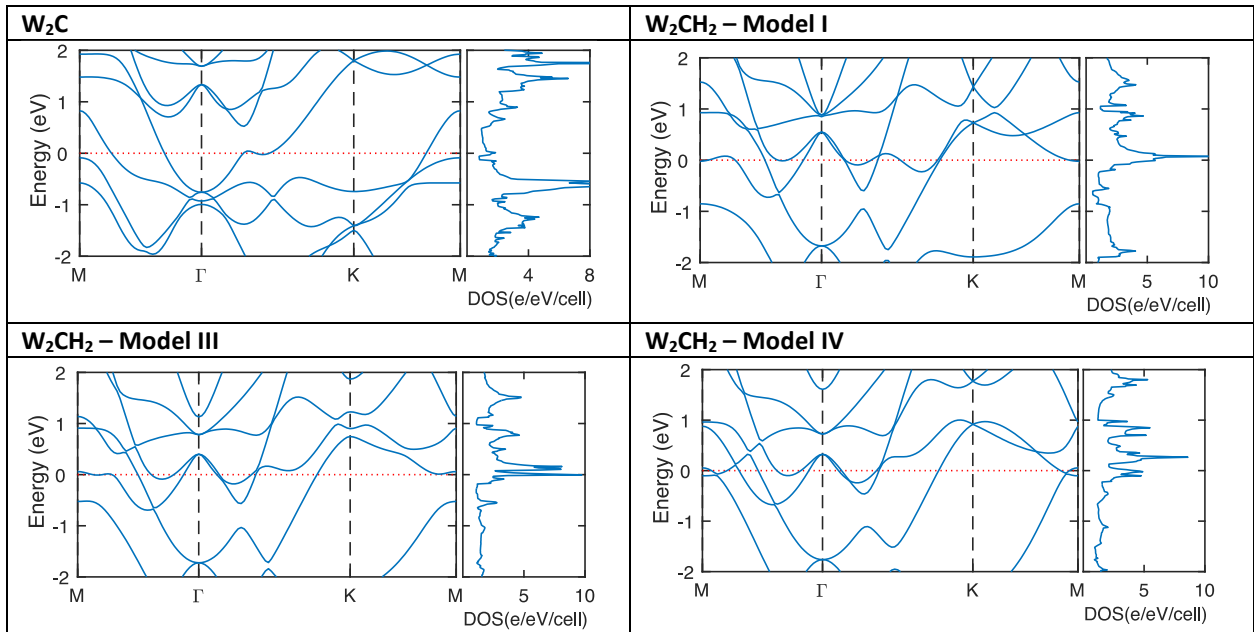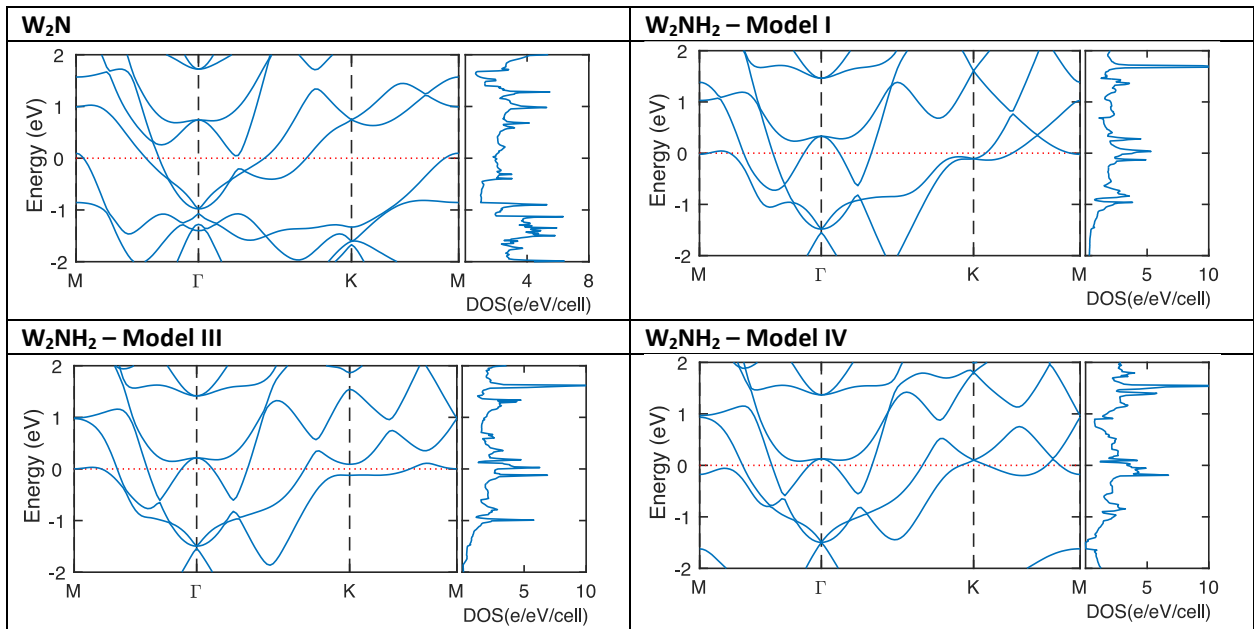

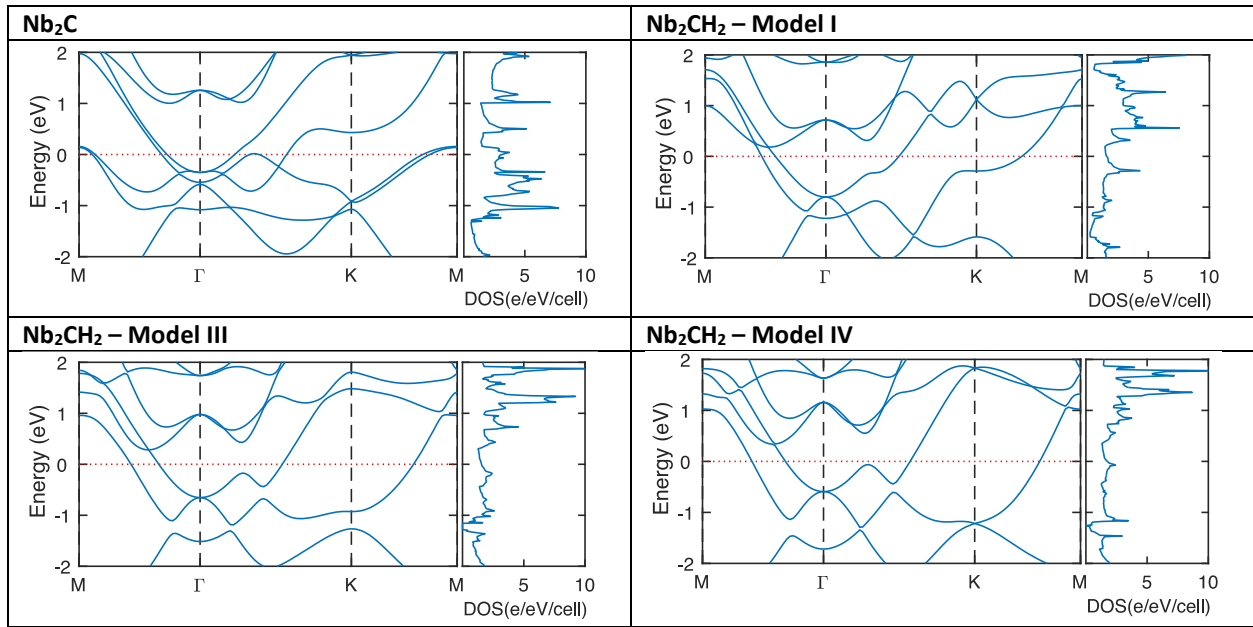

### FERMI SURFACES

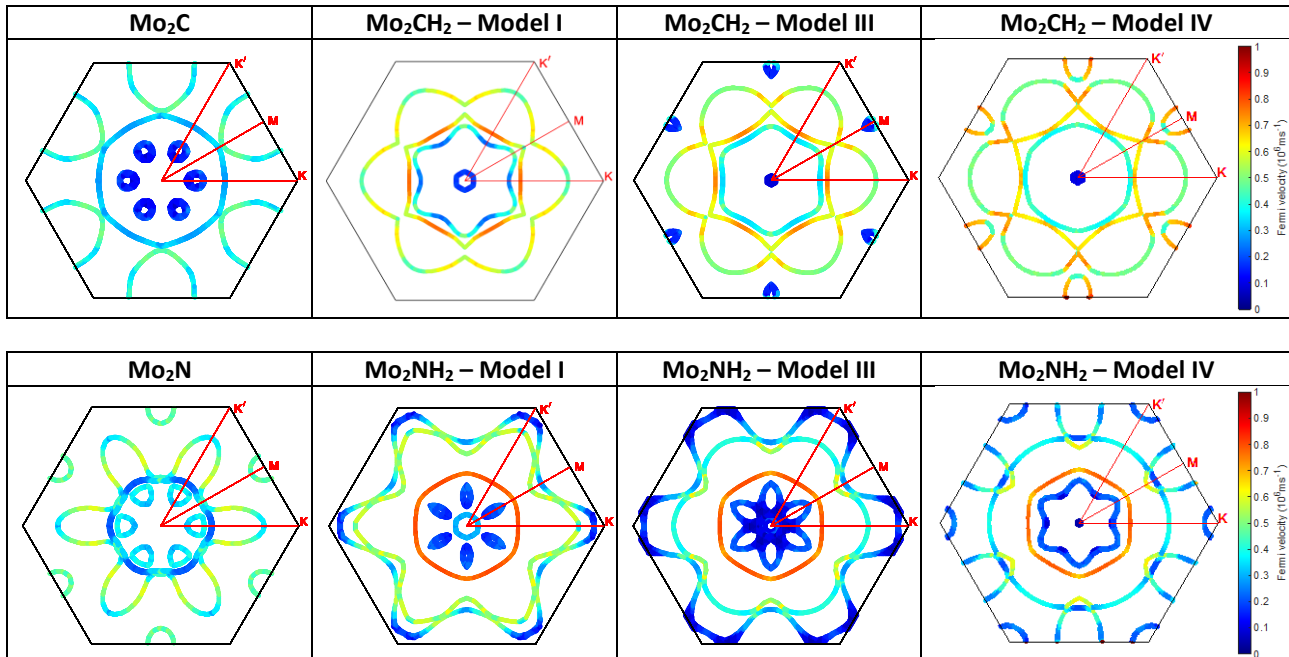



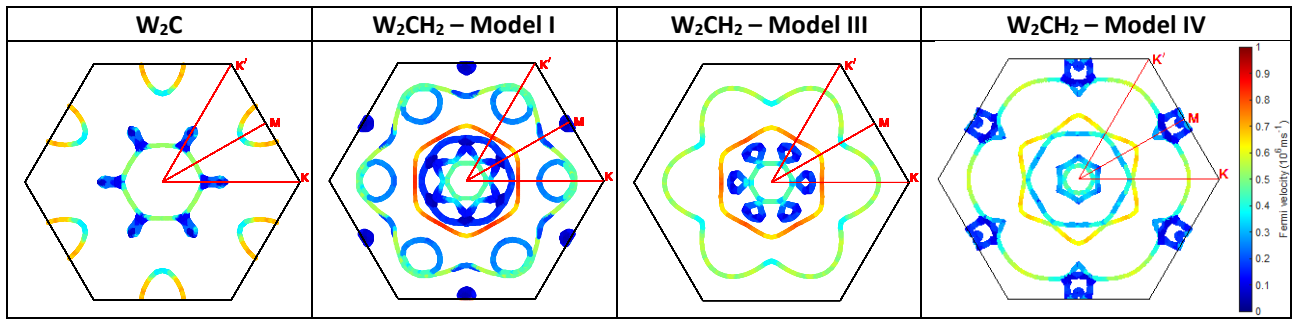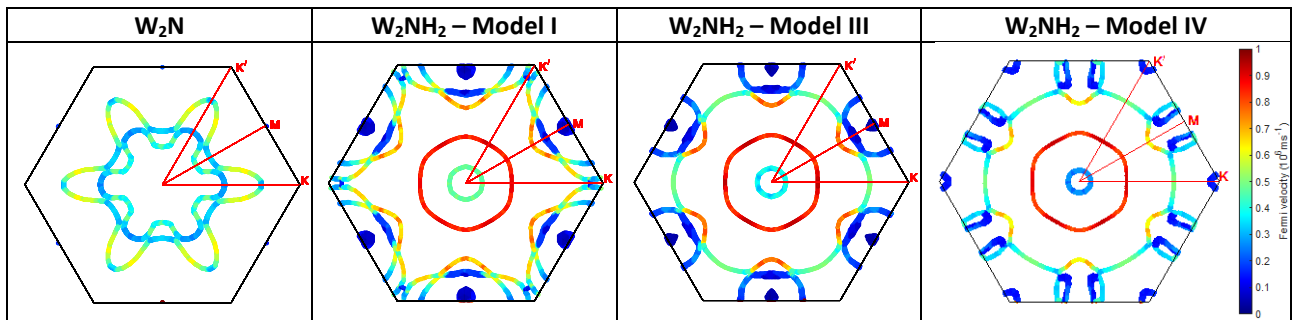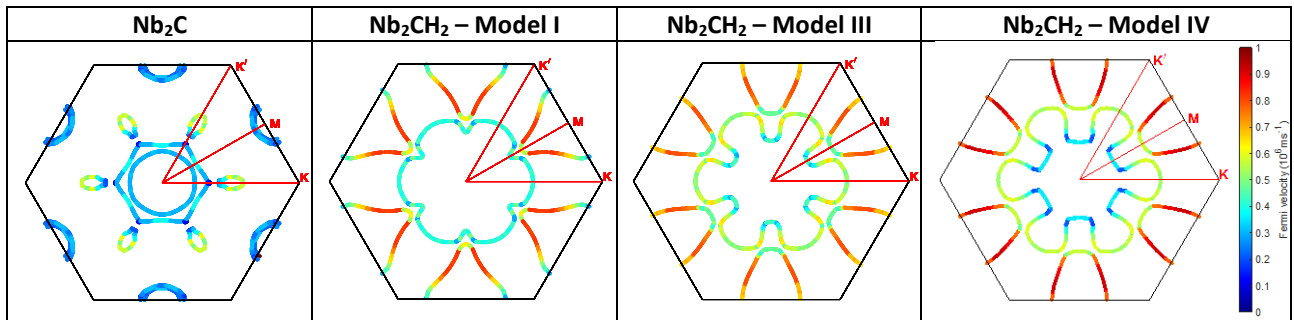

# ELECTRON-PHONON COUPLING

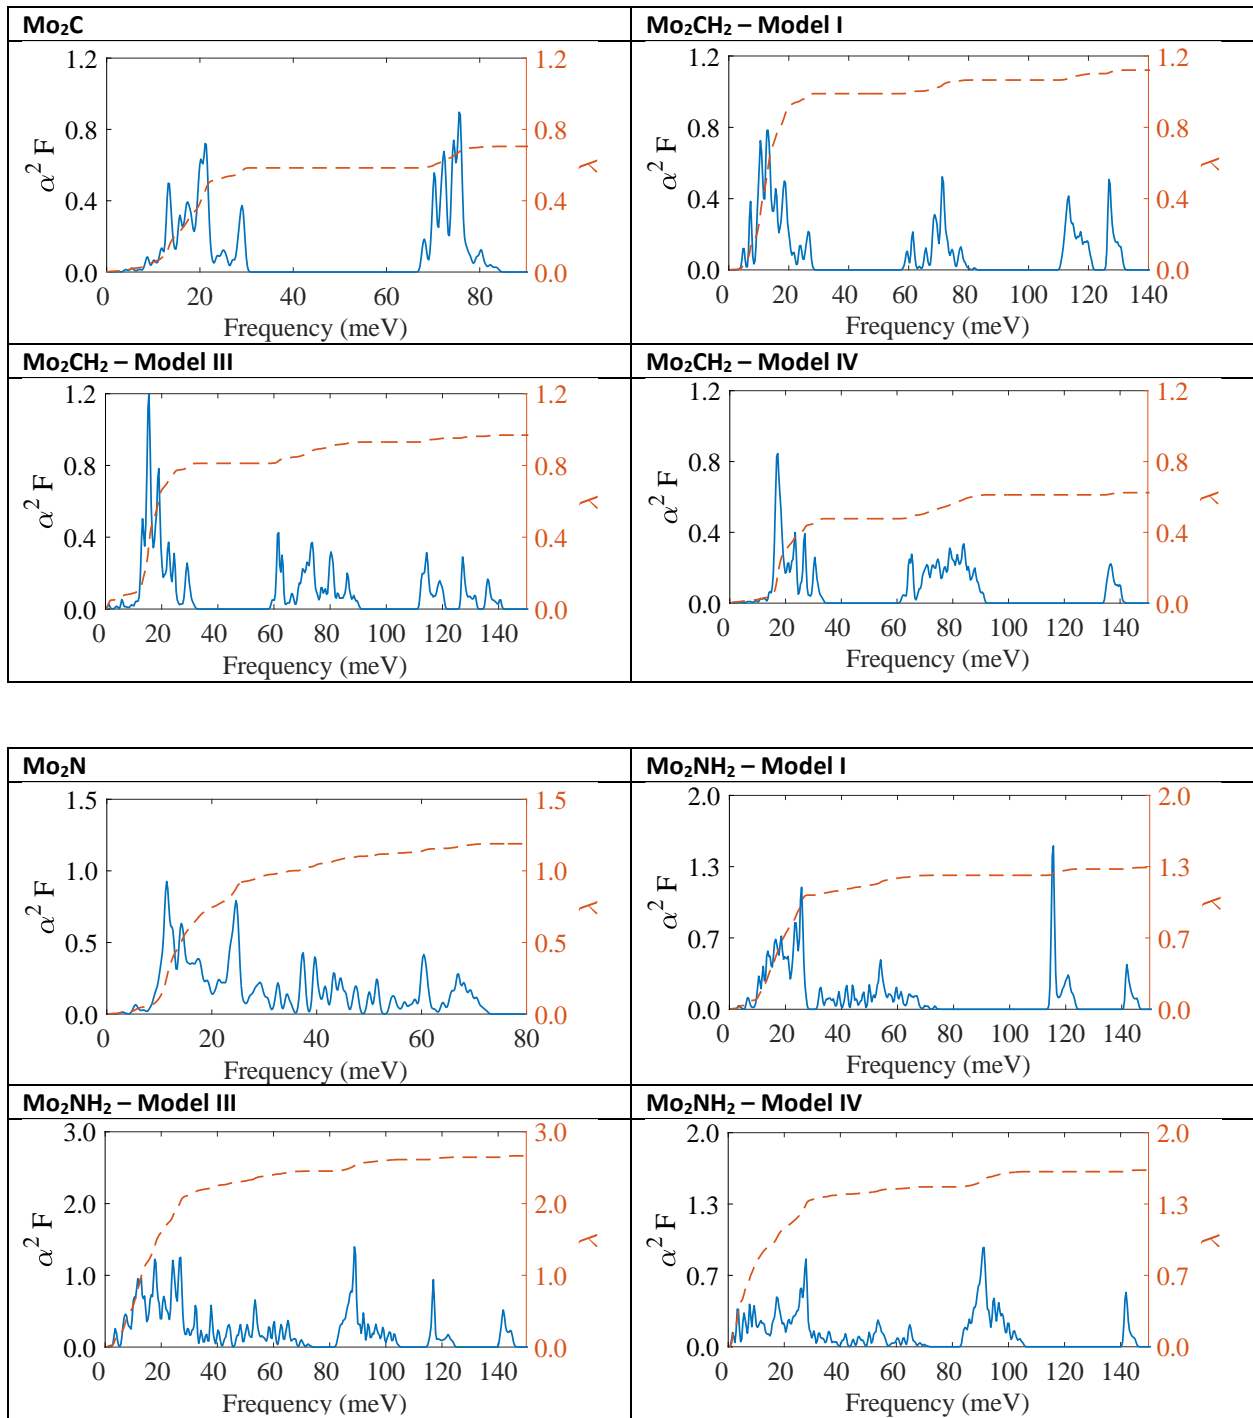

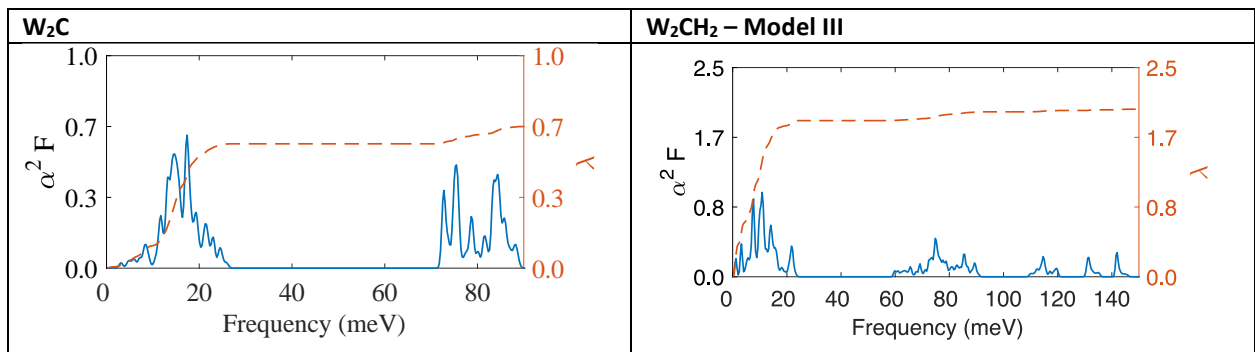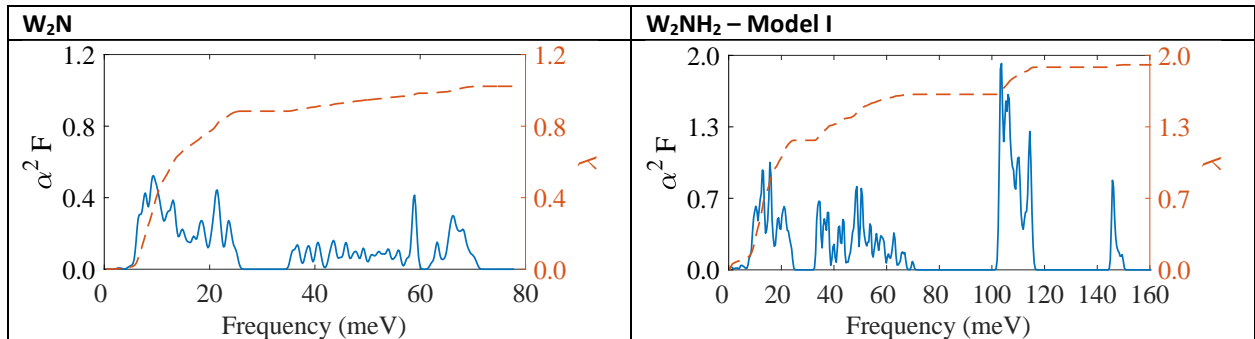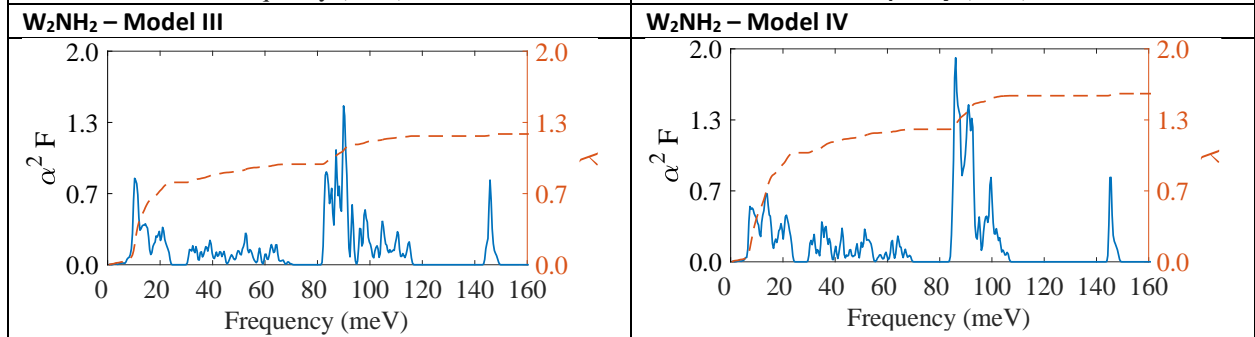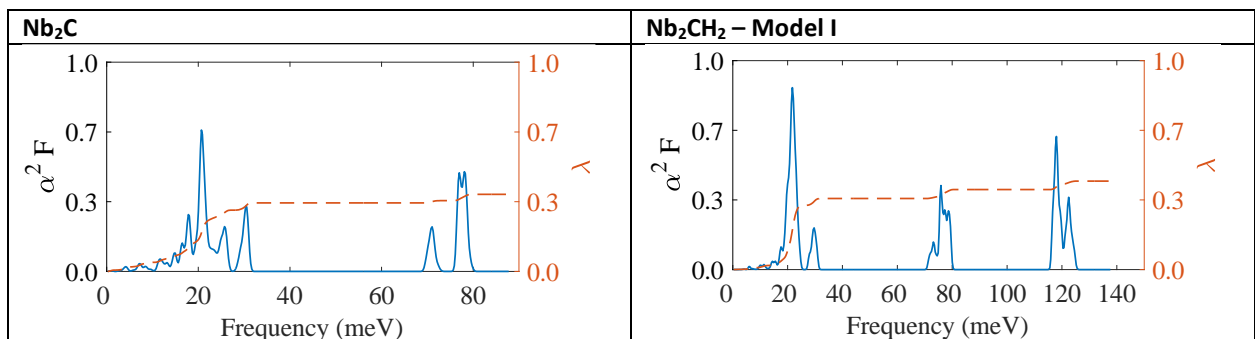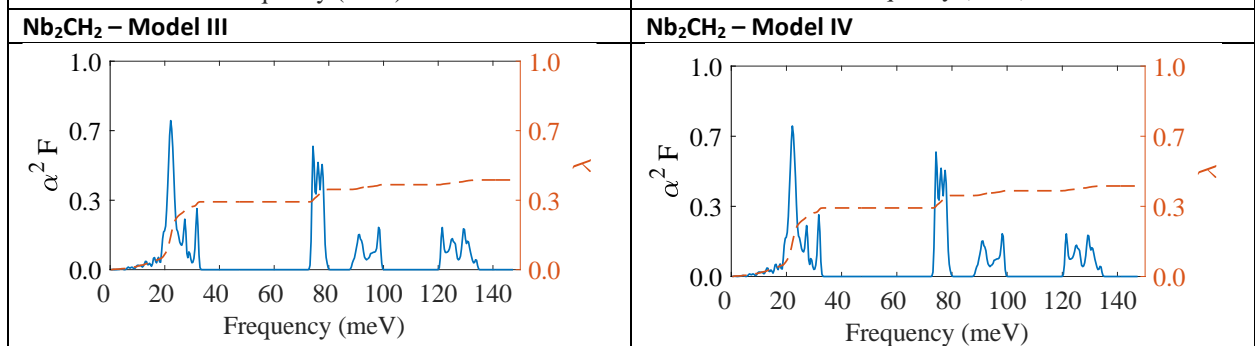

Supplement: d2nr01939f1.pdf [file d2nr01939f1.pdf]
